# Supplementary material for: Crowd-sourced trait data can be used to delimit global biomes
Source: Copernicus journal article supplement (doi:10.5194/egusphere-2024-276), 2024-02-20
Supplement: Supplementary file 1 [file egusphere-2024-276-supplement.pdf]

# **Crowd-sourced trait data can be used to delimit global biomes**

Simon Scheiter, Sophie Wolf, and Teja Kattenborn

30th January 2024

**Supplementary tables and figures**

Table S1: Traits included in the clustering. ‘TRY ID’ and ‘TRY trait name’ refer to the IDs and names used in the TRY trait database (Kattge et al. 2020).

| TRY ID | Abbreviation    | TRY trait name                                                                                                |
|--------|-----------------|---------------------------------------------------------------------------------------------------------------|
| X4     | WoodDensity     | Stem specific density (SSD) or wood density (stem dry mass per stem fresh volume)                             |
| X6     | RootDepth       | Root rooting depth                                                                                            |
| X11    | SLA             | Leaf area per leaf dry mass (specific leaf area, SLA or 1/LMA)                                                |
| X13    | LeafC           | Leaf carbon (C) content per leaf dry mass                                                                     |
| X14    | LeafN           | Leaf nitrogen (N) content per leaf dry mass                                                                   |
| X15    | LeafP           | Leaf phosphorus (P) content per leaf dry mass                                                                 |
| X18    | Height          | Plant height                                                                                                  |
| X21    | StemDiameter    | Stem diameter                                                                                                 |
| X26    | SeedMass        | Seed dry mass                                                                                                 |
| X27    | SeedLength      | Seed length                                                                                                   |
| X46    | LeafThickness   | Leaf thickness                                                                                                |
| X47    | LeafDMC         | Leaf dry mass per leaf fresh mass (leaf dry matter content, LDMC)                                             |
| X50    | LeafNArea       | Leaf nitrogen (N) content per leaf area                                                                       |
| X55    | LeafMassSingle  | Leaf dry mass (single leaf)                                                                                   |
| X78    | LeafNIsotope    | Leaf nitrogen (N) isotope signature ( $\delta^{15}\text{N}$ )                                                 |
| X95    | SeedGerm        | Seed germination rate (germination efficiency)                                                                |
| X138   | SeedNumber      | Seed number per reproduction unit                                                                             |
| X144   | LeafLenght      | Leaf length                                                                                                   |
| X145   | LeafWidth       | Leaf width                                                                                                    |
| X146   | LeafCN          | Leaf carbon/nitrogen (C/N) ratio                                                                              |
| X163   | LeafMass        | Leaf fresh mass                                                                                               |
| X169   | ConduitDensity  | Stem conduit density (vessels and tracheids)                                                                  |
| X223   | ChromNumber     | Species genotype: chromosome number                                                                           |
| X224   | ChromCDNA       | Species genotype: chromosome cDNA content                                                                     |
| X237   | Dispersal       | Dispersal unit length                                                                                         |
| X281   | ConduitDiameter | Stem conduit diameter (vessels, tracheids)                                                                    |
| X282   | VesselLength    | Wood vessel element length; stem conduit (vessel and tracheids) element length                                |
| X289   | FiberLength     | Wood fiber lengths                                                                                            |
| X1080  | SRL             | Root length per root dry mass (specific root length, SRL)                                                     |
| X3112  | LeafArea1       | Leaf area (in case of compound leaves: leaf, undefined if petiole in- or excluded)                            |
| X3113  | LeafArea2       | Leaf area (in case of compound leaves: leaflet, undefined if petiole is in- or excluded)                      |
| X3114  | LeafArea3       | Leaf area (in case of compound leaves: undefined if leaf or leaflet, undefined if petiole is in- or excluded) |
| X3120  | LeafWater       | Leaf water content per leaf dry mass (not saturated)                                                          |

Table S2: Number of cluster analyses conducted for different numbers of traits and different F31 biome maps (Fischer et al. 2022) in the sensitivity analysis. For each cluster analysis, traits were sampled randomly from all 33 traits included in the analysis (see Table. S1).

| Map    | 3    | 4    | 5    | 6    | 7    | 8    | 9    | 10   | 11   | 12  | Sum   |
|--------|------|------|------|------|------|------|------|------|------|-----|-------|
| Map 1  | 122  | 109  | 87   | 81   | 57   | 66   | 39   | 35   | 33   | 24  | 653   |
| Map 2  | 114  | 92   | 95   | 96   | 50   | 85   | 31   | 33   | 28   | 37  | 661   |
| Map 3  | 105  | 150  | 94   | 92   | 51   | 64   | 34   | 35   | 41   | 27  | 693   |
| Map 4  | 107  | 84   | 116  | 87   | 67   | 46   | 33   | 33   | 36   | 35  | 644   |
| Map 5  | 109  | 122  | 86   | 90   | 55   | 41   | 31   | 30   | 39   | 32  | 635   |
| Map 6  | 294  | 117  | 95   | 81   | 97   | 42   | 31   | 30   | 39   | 27  | 853   |
| Map 7  | 257  | 89   | 84   | 134  | 63   | 41   | 42   | 30   | 35   | 26  | 801   |
| Map 8  | 212  | 145  | 89   | 115  | 98   | 75   | 42   | 41   | 49   | 26  | 892   |
| Map 9  | 122  | 87   | 88   | 78   | 74   | 50   | 38   | 37   | 28   | 24  | 626   |
| Map 10 | 250  | 112  | 99   | 77   | 49   | 41   | 32   | 35   | 38   | 39  | 772   |
| Map 11 | 125  | 118  | 76   | 85   | 59   | 39   | 42   | 38   | 38   | 29  | 649   |
| Map 12 | 114  | 105  | 85   | 78   | 69   | 46   | 42   | 37   | 31   | 28  | 635   |
| Map 13 | 113  | 86   | 81   | 79   | 65   | 77   | 37   | 36   | 46   | 38  | 658   |
| Map 14 | 110  | 111  | 100  | 115  | 84   | 40   | 41   | 40   | 30   | 28  | 699   |
| Map 15 | 334  | 94   | 98   | 129  | 50   | 36   | 32   | 49   | 29   | 37  | 888   |
| Map 16 | 106  | 121  | 77   | 85   | 67   | 48   | 48   | 36   | 48   | 45  | 681   |
| Map 17 | 124  | 88   | 83   | 87   | 69   | 41   | 40   | 37   | 32   | 27  | 628   |
| Map 18 | 117  | 91   | 79   | 181  | 48   | 45   | 31   | 34   | 28   | 29  | 683   |
| Map 19 | 118  | 123  | 81   | 79   | 55   | 42   | 55   | 31   | 33   | 31  | 648   |
| Map 20 | 289  | 82   | 99   | 79   | 66   | 66   | 36   | 35   | 38   | 26  | 816   |
| Map 21 | 114  | 89   | 92   | 118  | 47   | 42   | 44   | 42   | 32   | 30  | 650   |
| Map 22 | 119  | 85   | 80   | 76   | 66   | 49   | 32   | 33   | 30   | 32  | 602   |
| Map 23 | 260  | 84   | 88   | 94   | 46   | 41   | 31   | 31   | 39   | 36  | 750   |
| Map 24 | 112  | 87   | 91   | 92   | 69   | 71   | 31   | 31   | 39   | 32  | 655   |
| Map 25 | 109  | 118  | 85   | 104  | 63   | 40   | 31   | 43   | 56   | 33  | 682   |
| Map 26 | 106  | 84   | 93   | 109  | 61   | 60   | 33   | 31   | 33   | 25  | 635   |
| Map 27 | 260  | 89   | 94   | 176  | 47   | 43   | 42   | 31   | 26   | 26  | 834   |
| Map 28 | 112  | 89   | 91   | 107  | 79   | 36   | 42   | 30   | 26   | 33  | 645   |
| Map 29 | 293  | 107  | 91   | 88   | 51   | 47   | 49   | 69   | 32   | 25  | 852   |
| Map 30 | 109  | 87   | 91   | 94   | 48   | 44   | 39   | 31   | 26   | 38  | 607   |
| Map 31 | 120  | 85   | 95   | 161  | 46   | 99   | 35   | 37   | 34   | 28  | 740   |
| Sum    | 4956 | 3130 | 2783 | 3147 | 1916 | 1603 | 1166 | 1121 | 1092 | 953 | 21867 |

Table S3: Word count of biome names in F31 maps. The attributes were group with respect to biome types, climate, growth form or phenology.

| word          | count | word       | count |
|---------------|-------|------------|-------|
| forest        | 179   | broadleaf  | 40    |
| desert        | 53    | needleleaf | 24    |
| savanna       | 37    | conifer    | 23    |
| grassland     | 35    | herbaceous | 8     |
| steppe        | 30    | bush       | 9     |
| tundra        | 29    | tree       | 16    |
| woodland      | 26    | thorn      | 7     |
| rainforest    | 24    | dwarf      | 6     |
| shrub         | 52    |            |       |
| semidesert    | 17    | dry        | 67    |
| cropland      | 17    | cold       | 51    |
| taiga         | 5     | summer     | 50    |
|               |       | winter     | 30    |
| temperate     | 84    | warm       | 24    |
| tropical      | 99    | moist      | 23    |
| subtropical   | 39    | polar      | 24    |
| boreal        | 28    | hot        | 22    |
| mediterranean | 9     | cool       | 14    |
|               |       | nemoral    | 13    |
| evergreen     | 48    | arid       | 12    |
| deciduous     | 40    | wet        | 13    |
| summergreen   | 7     | seasonal   | 7     |
| mixed         | 22    | xeric      | 7     |
| open          | 24    |            |       |
| closed        | 22    |            |       |

Table S4: Word count of biome names in F31 maps for biomes including the most frequent words from Table S3: ‘tropical’, ‘temperate’ and ‘forest’.

| word                | count | word                | count |
|---------------------|-------|---------------------|-------|
| <i>tropical</i>     |       | <i>temperate</i>    |       |
| forest tropical     | 57    | forest temperate    | 31    |
| rainforest tropical | 19    | summer temperate    | 18    |
| savanna tropical    | 13    | dry temperate       | 19    |
| desert tropical     | 15    | warm temperate      | 17    |
| dry tropical        | 11    | cool temperate      | 10    |
| grassland tropical  | 10    | broadleaf temperate | 8     |
| broadleaf tropical  | 9     | desert temperate    | 8     |
| evergreen tropical  | 8     | grassland temperate | 8     |
| seasonal tropical   | 7     | evergreen temperate | 7     |
| moist tropical      | 6     | hot temperate       | 6     |
| deciduous tropical  | 4     | season temperate    | 6     |
| <hr/>               |       |                     |       |
| <i>forest</i>       |       |                     |       |
| tropical forest     | 57    |                     |       |
| evergreen forest    | 37    |                     |       |
| broadleaf forest    | 33    |                     |       |
| deciduous forest    | 31    |                     |       |
| temperate forest    | 31    |                     |       |
| rainforest forest   | 24    |                     |       |
| subtropical forest  | 24    |                     |       |
| mixed forest        | 18    |                     |       |
| needleleaf forest   | 18    |                     |       |
| boreal forest       | 16    |                     |       |
| coniferous forest   | 15    |                     |       |

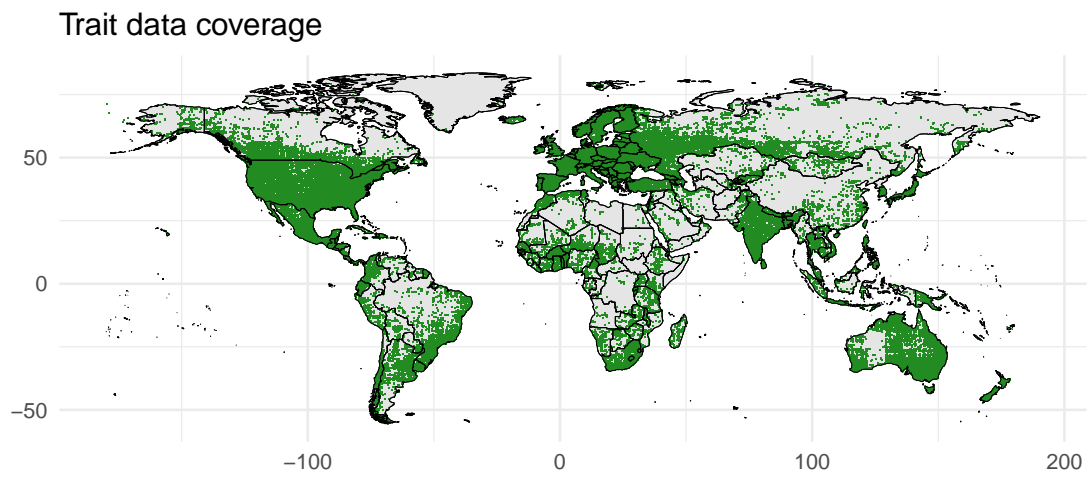

Figure S1: Coverage of trait data used in this study. Trait data were obtained by merging TRY trait data and GBIF species distribution data (see Methods for details). The spatial resolution is  $0.5^\circ$ .

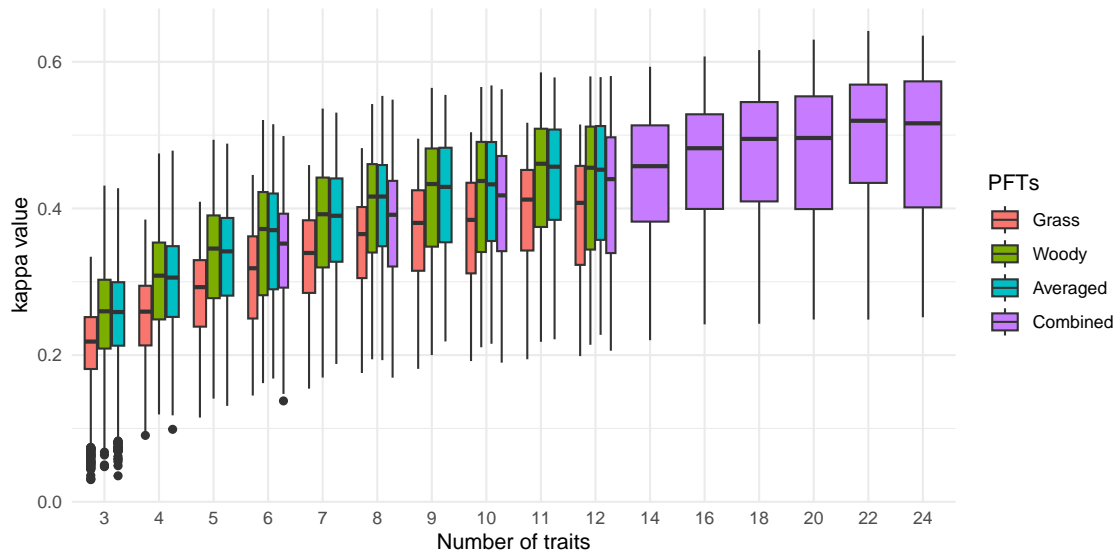

Figure S2: Relation between data-model agreement and the number of traits included in the cluster analysis. For each number of traits, the traits were randomly selected, and clustering was conducted for all F31 biome maps. At least 600 cluster analysis were conducted for each F31 map. Traits were sampled from those provided in Table S1 for different combinations of PFTs. Data-model agreement is represented by the  $\kappa$  statistics.

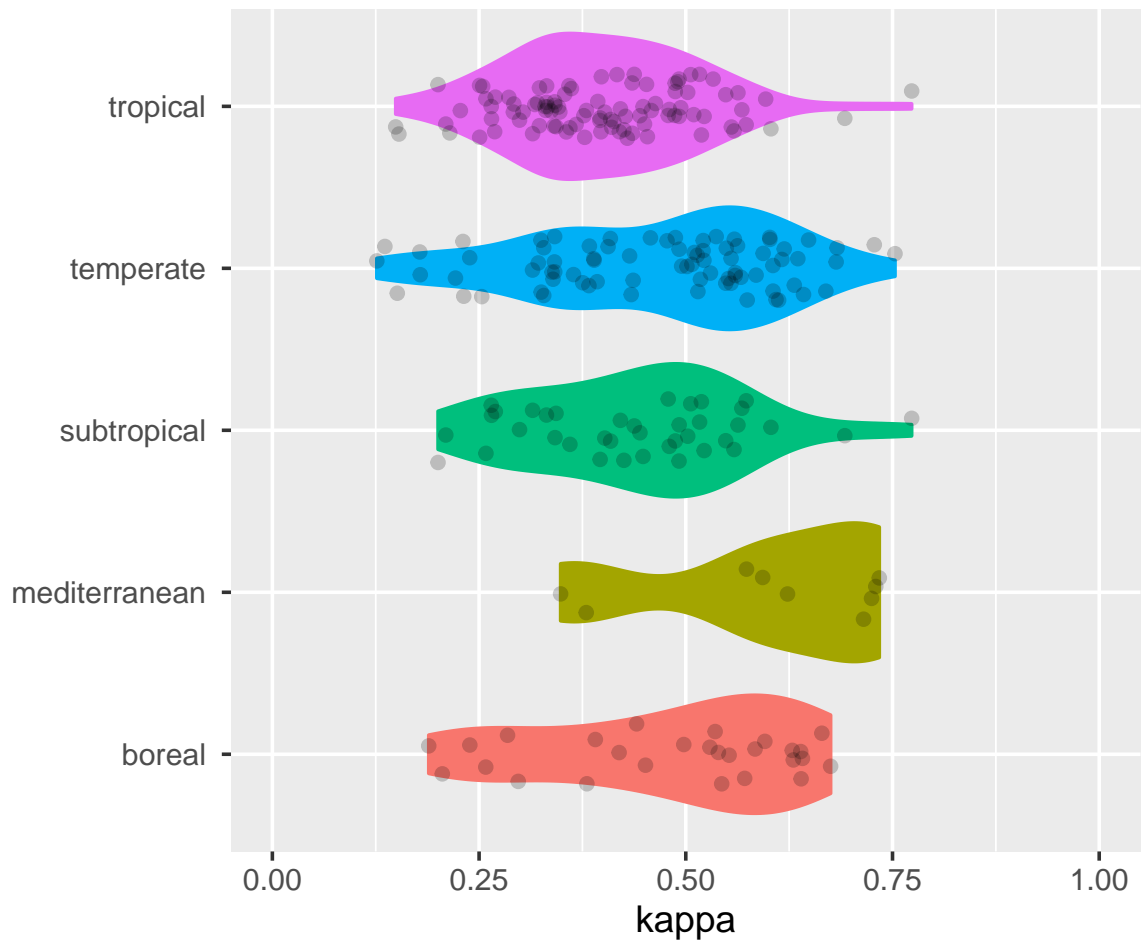

Figure S3: Model performance ( $\kappa$  values) in different biomes selected by climate zone. For this analysis, all F31 biome maps containing one of the words in the figure were selected, and  $\kappa$  values were calculated for those biomes.



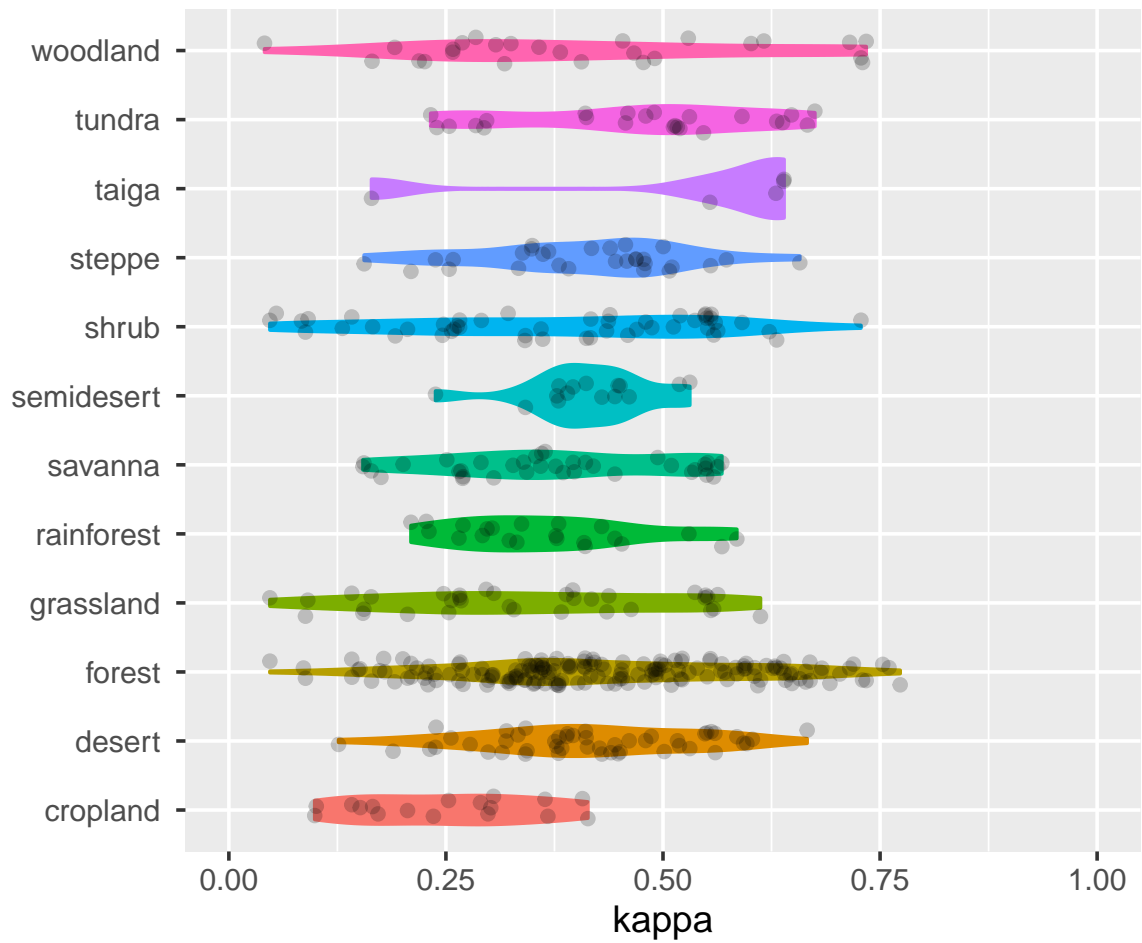

Figure S4: Model performance ( $\kappa$  values) in different biomes selected by biome type. For this analysis, all biomes that contain the attributes provided in the figure in their names were identified in the F31 biome maps. Then, the  $\kappa$  value was calculated for each biome (represented by the points in the figure).

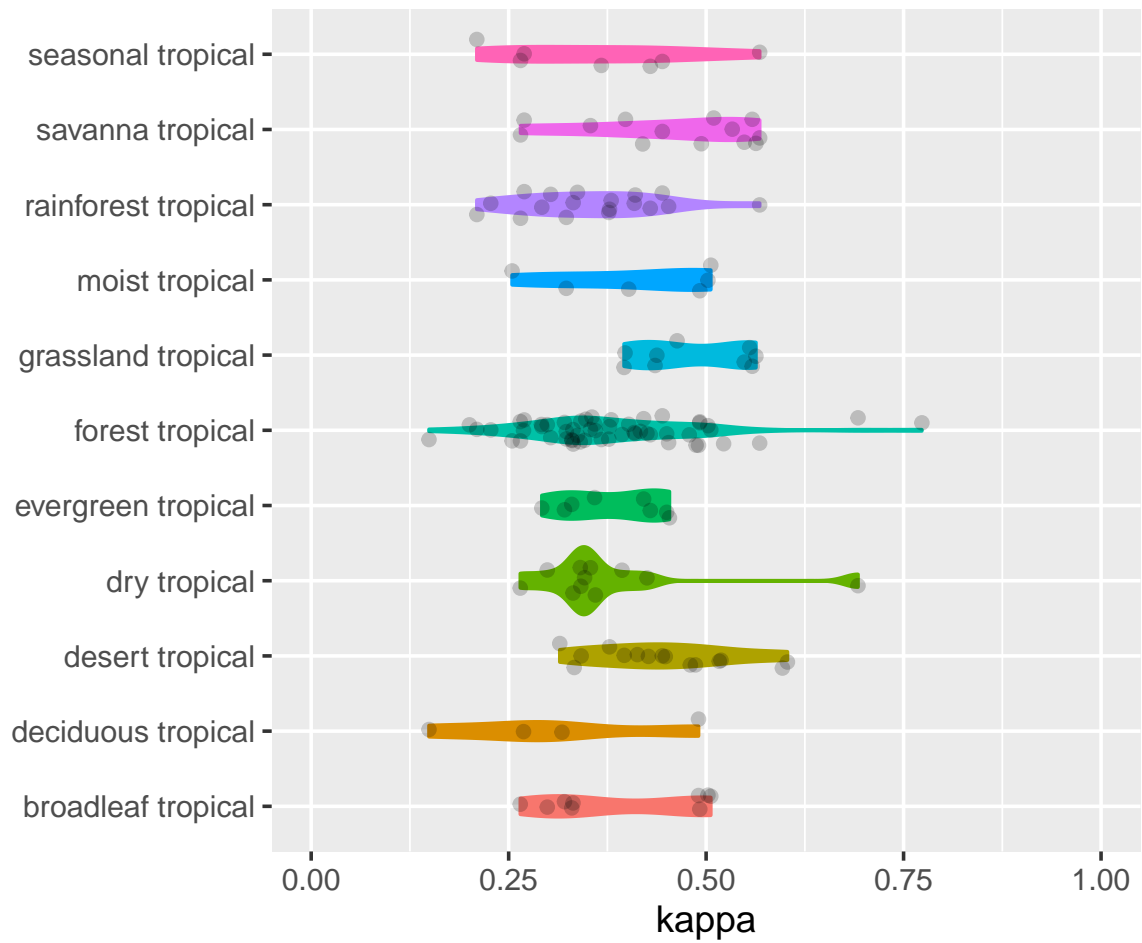

Figure S5: Model performance ( $\kappa$  values) in different biomes in tropical regions. For this analysis, all biomes that contain the attributes provided in the figure in their names were identified in the F31 biome maps. Then, the  $\kappa$  value was calculated for each biome (represented by the points in the figure).

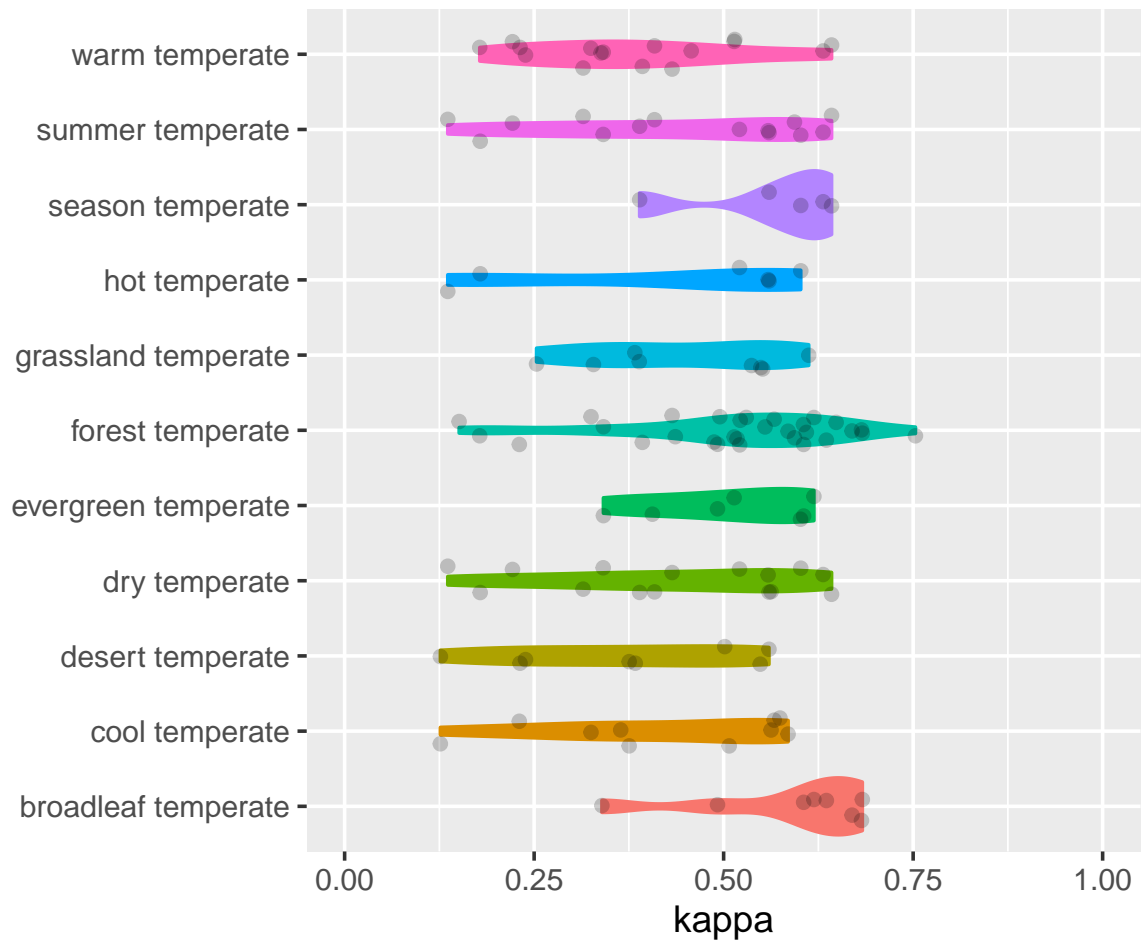

Figure S6: Model performance ( $\kappa$  values) in different biomes in temperate regions. For this analysis, all biomes that contain the attributes provided in the figure in their names were identified in the F31 biome maps. Then, the  $\kappa$  value was calculated for each biome (represented by the points in the figure).

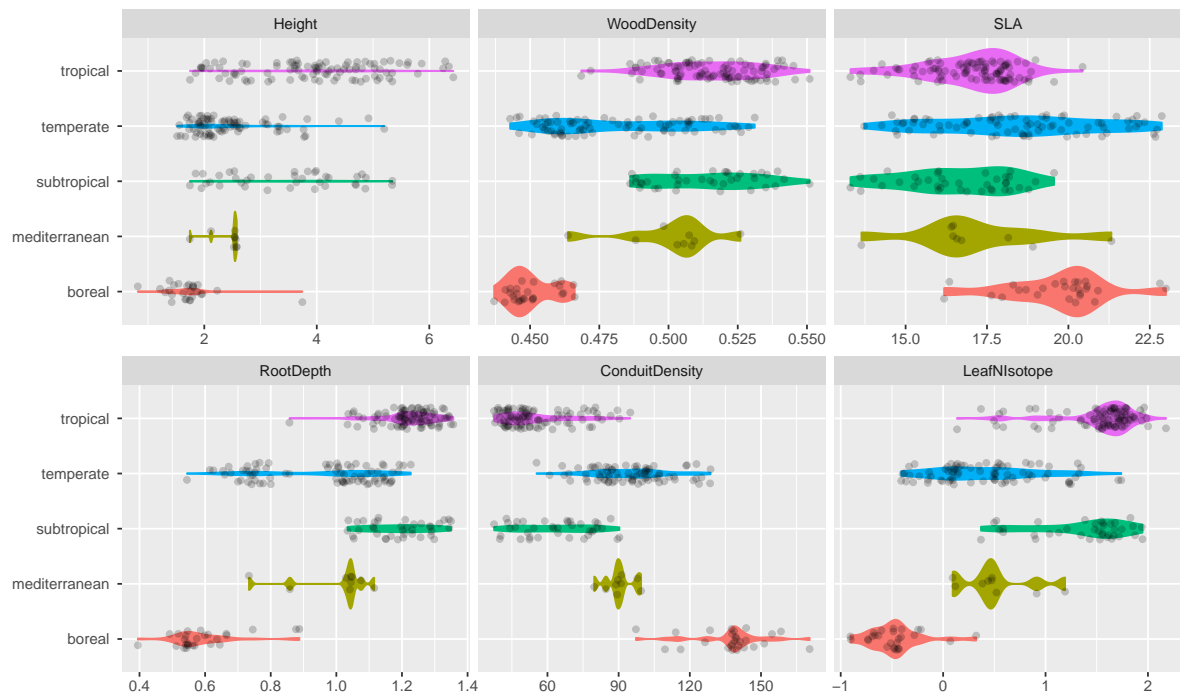

Figure S7: Mean trait values in different biomes selected by climate zone. For this analysis, all biomes that contain the attributes provided in the figure in their names were identified in the F31 biome maps. Then, the mean trait values were calculated for each biome (represented by the points in the figure).

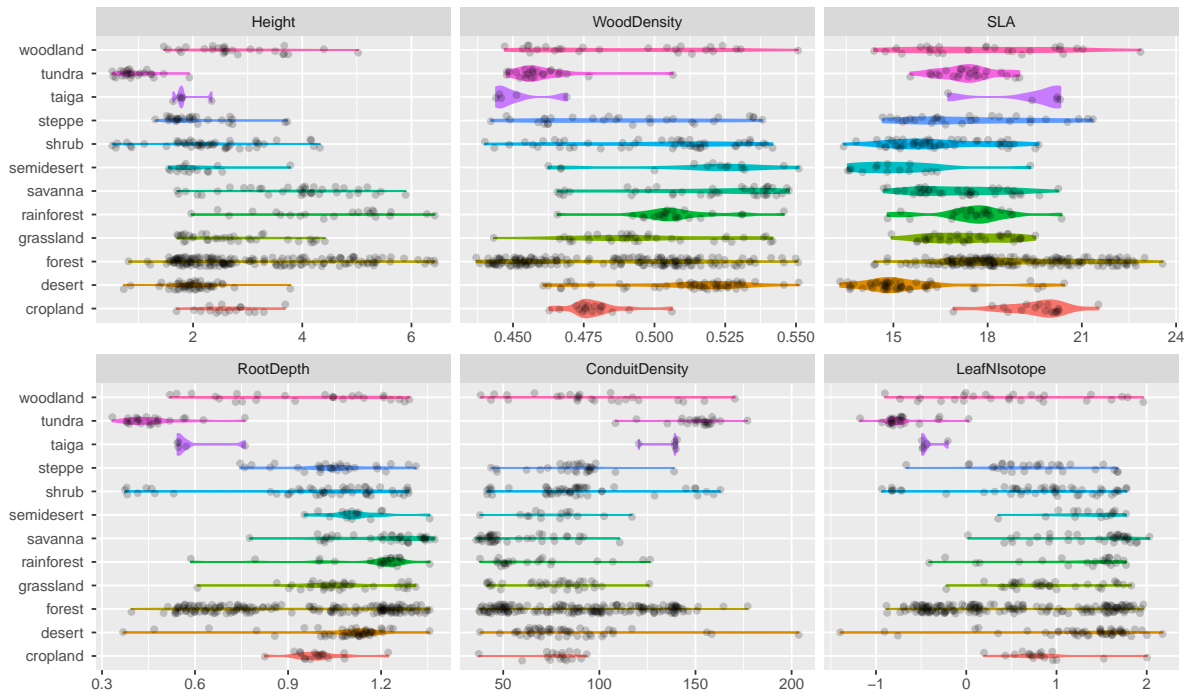

Figure S8: Mean trait values in different biomes selected by biome type. For this analysis, all biomes that contain the attributes provided in the figure in their names were identified in the F31 biome maps. Then, the mean trait values were calculated for each biome (represented by the points in the figure).

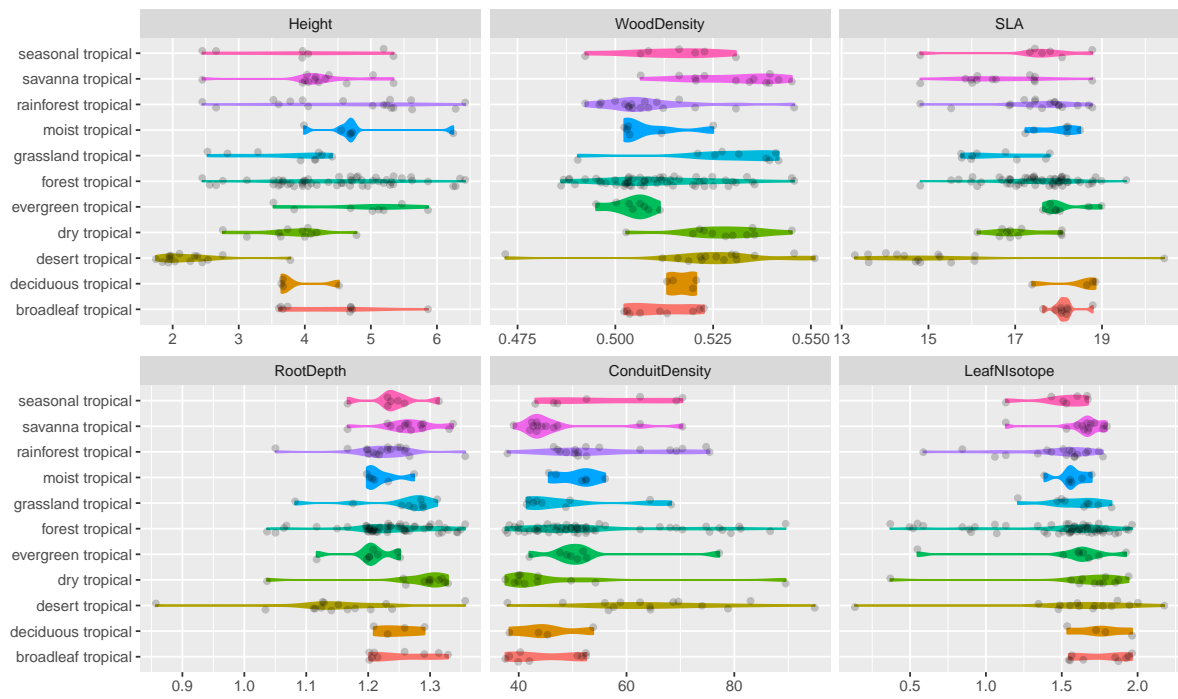

Figure S9: Mean trait values in different biomes in tropical regions. For this analysis, all biomes that contain the attributes provided in the figure in their names were identified in the F31 biome maps. Then, the mean trait values were calculated for each biome (represented by the points in the figure).

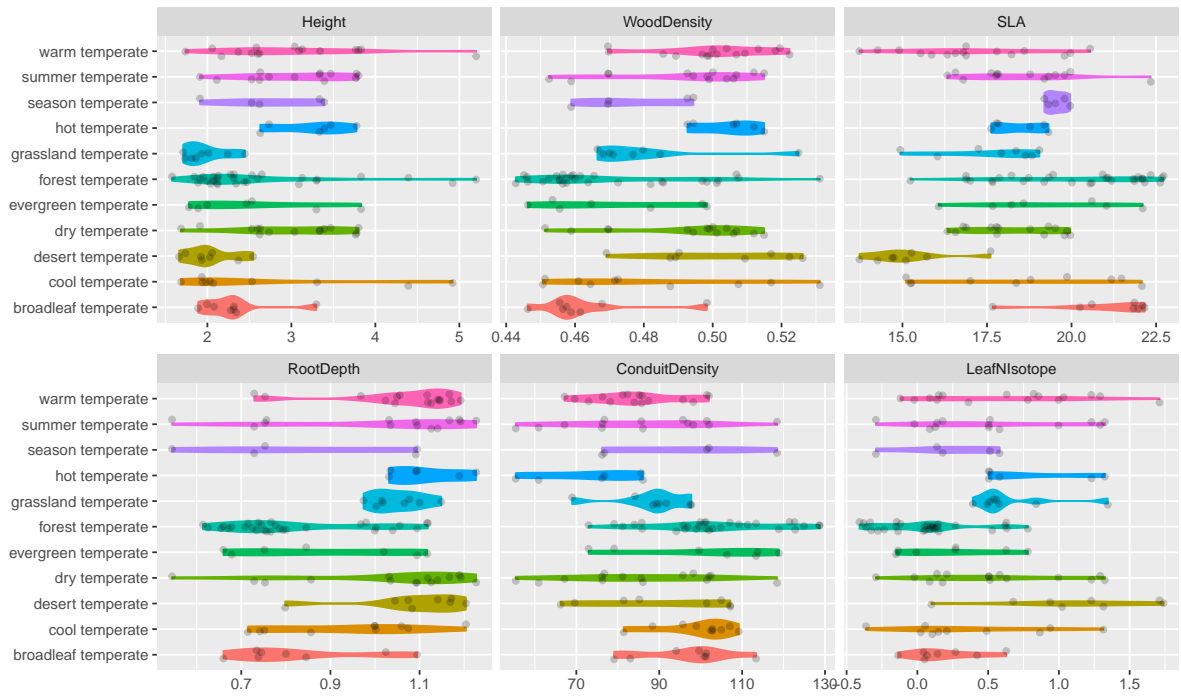

Figure S10: Mean trait values in different biomes in temperate regions. For this analysis, all biomes that contain the attributes provided in the figure in their names were identified in the F31 biome maps. Then, the mean trait values were calculated for each biome (represented by the points in the figure).

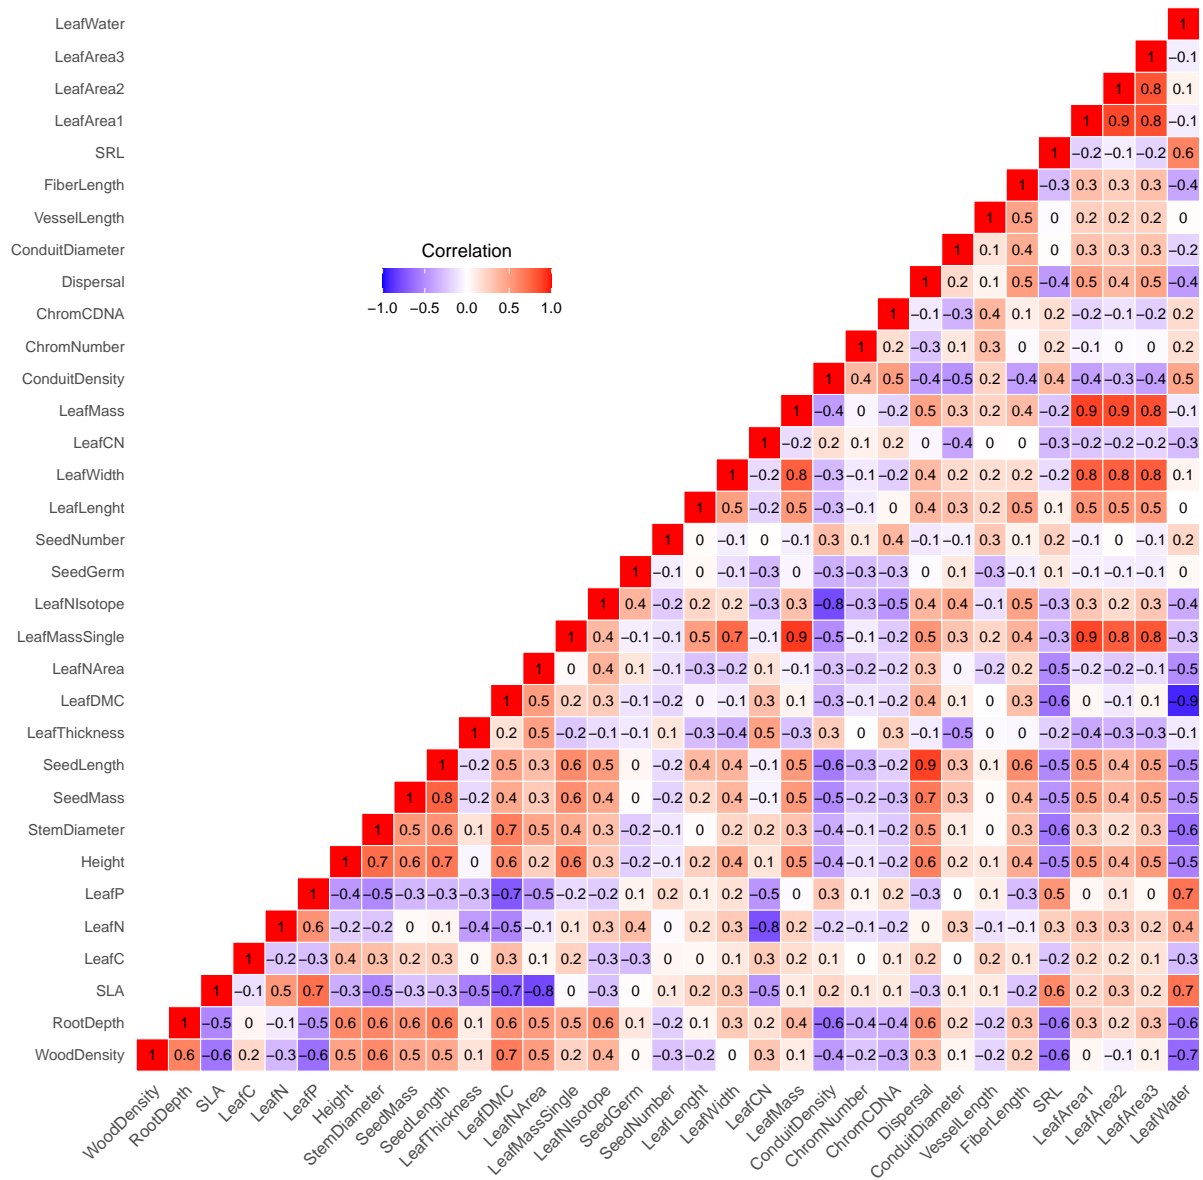

Figure S11: Correlation between all traits included in the analysis.



## References

- Fischer JC, Walentowitz A, Beierkuhnlein C (2022) The biome inventory - standardizing global biogeographical land units. Global Ecology and Biogeography, **31**, 2172–2183.
- Kattge J, Bönisch G, Díaz S, et al. (2020) TRY plant trait database - enhanced coverage and open access. Global Change Biology, **26**, 119–188.
